# Supplementary material for: Pangenomics of flax fungal parasite Fusarium oxysporum f. sp. lini
Source: Front Plant Sci. 2024 May 30;15:1383914. doi: 10.3389/fpls.2024.1383914 (PMC11169931; doi:10.3389/fpls.2024.1383914)
Supplement: Supplementary file 2 [file Table_1.xlsx]

## Sheet: Table S1
Table S1. List of isolates used in phylogenetic analysis of different Fo ff. spp.
Name	Species name and strain	Host	Accession Number
NRRL28921	Fusarium oxysporum f.sp. lini	Linum usitatissimum	AF246875.1
NRRL28920	Fusarium oxysporum f.sp. lini	Linum usitatissimum	AF246883.1
NRRL28924	Fusarium oxysporum f.sp. lini	Linum usitatissimum	AF246885.1
NRRL28929	Fusarium oxysporum f.sp. lini	Linum usitatissimum	AF246889.1
NRRL28930	Fusarium oxysporum f.sp. lini	Linum usitatissimum	AF246890.1
NRRL28919	Fusarium oxysporum f.sp. lini	Linum usitatissimum	AF246882.1
Folini-2	Fusarium oxysporum f.sp. lini	Linum usitatissimum	AF363404.1
Folini-1	Fusarium oxysporum f.sp. lini	Linum usitatissimum	AF363405.1
NRRL36357	Fusarium oxysporum f.sp. lini	Linum usitatissimum	FJ985349.1
pis_hdv247	Fusarium oxysporum f.sp. pisi	Pisum sativum	JH650973
FRL11810	Fusarium oxysporum f.sp. lini	Linum usitatissimum	KM893879.1
NRRL28932	Fusarium oxysporum f.sp. lini	Linum usitatissimum	JQ265777.1
FRL11811	Fusarium oxysporum f.sp. lini	Linum usitatissimum	KM893880.1
NRRL29084	Fusarium oxysporum f.sp. lini	Linum usitatissimum	AF246879.1
NRRL29094	Fusarium oxysporum f.sp. lini	Linum usitatissimum	AF246892.1
Cong1-1	Fusarium oxysporum f.sp. conglutinans	Brassica oleracea	JH658801
raphani strain 54005	Fusarium oxysporum f.sp. raphani	Raphanus sativus	JH658363
vasinf	Fusarium oxysporum f.sp. vasinfectum, strain 25433	Gossipium spp.	JH657919
NRRL36286	Fusarium oxysporum f.sp. lini	Gossipium spp.	NRRL36286
cub-1	Fusarium oxysporum f.sp. cubense race 1	Musa spp.	KB730167
Fo-47	Fusarium oxysporum		JH717900
rad-lyc	Fusarium oxysporum f.sp. radicis-lycopersici	Fabaceae, Cucurbitaceae, Apiaceae, Solanaceae	JH651391
Foc-FUS2	Fusarium oxysporum f.sp. cepae	Allium cepa	MRCU01000006.1
Fol-mn25	Fusarium oxysporum f.sp. lycopersici	Solanum lycopersicum	JH650840
fosc-3a	Fusarium oxysporum	H. S. clinical isolate	JH717844
melonis	Fusarium oxysporum f.sp. melonis	Cucumis melo	JH659339
Fol4287	Fusarium oxysporum f.sp. lycopersici	Solanum lycopersicum	LS479646.1
NRRL28928	Fusarium oxysporum f.sp. lini	Linum usitatissimum	AF246877.1
NRRL28926	Fusarium oxysporum f.sp. lini	Linum usitatissimum	AF246887.1
NRRL28925	Fusarium oxysporum f.sp. lini	Linum usitatissimum	AF246886.1
NRRL28922	Fusarium oxysporum f.sp. lini	Linum usitatissimum	AF246884.1
NRRL28923	Fusarium oxysporum f.sp. lini	Linum usitatissimum	AF246876.1
cub-4	Fusarium oxysporum f.sp. cubense	Musa spp.	KB726998
cub-t4	Fusarium oxysporum f.sp. cubense	Musa spp.	JH658299
cub-XJ37	Fusarium oxysporum f.sp. cubense	Musa spp.	KC889026.1
CAV329	Fusarium oxysporum f.sp. lini	Linum usitatissimum	FJ664917.1
Fsolani	Fusarium solani	Solanum tuberosum	MN689879.1
Fave	Fusarium avenaceum	Poaceae, Fabaceae, Linum usitatissimum	KP965731
Fvert	Fusarium verticilloides	Zea mays	MG428709.1
Fgram	Fusarium graminearum	Poaceae	KX084061.1

## Sheet: Table S2
Table S2. List of isolates used in phylogenetic analysis of SIX genes.
Name	Species name	Host	S I X1	S I X7	S I X10	S I X12	S I X13
cub_Kltn2-3	Fusarium oxysporum f.sp. cubense	Musa spp.	MH734333.1	-	-	-	-
cub_Prk6-1	Fusarium oxysporum f.sp. cubense	Musa spp.	MH734318.1	-	-	-	-
cub_NS5-10	Fusarium oxysporum f.sp. cubense	Musa spp.	MH734319.1	-	-	-	-
cub_Jhr4-1	Fusarium oxysporum f.sp. cubense	Musa spp.	MH734331.1	-	-	-	-
cub_Phg4-2	Fusarium oxysporum f.sp. cubense	Musa spp.	MH734327.1	-	-	-	-
cub_Kltn4-1	Fusarium oxysporum f.sp. cubense	Musa spp.	MH734329.1	-	-	-	-
cub_Kltn1-3	Fusarium oxysporum f.sp. cubense	Musa spp.	MH734328.1	-	-	-	-
cub_NS5-2	Fusarium oxysporum f.sp. cubense	Musa spp.	MH734324.1	-	-	-	-
cub_Sel4	Fusarium oxysporum f.sp. cubense	Musa spp.	MH734321.1	-	-	-	-
cub_NS2-7	Fusarium oxysporum f.sp. cubense	Musa spp.	MH734326.1	-	-	-	-
cub_Prk1-10	Fusarium oxysporum f.sp. cubense	Musa spp.	MH734322.1	-	-	-	-
cub_Jhr3-2	Fusarium oxysporum f.sp. cubense	Musa spp.	MH734325.1	-	-	-	-
cub_Prk2	Fusarium oxysporum f.sp. cubense	Musa spp.	MH734320.1	-	-	-	-
cub_Prk1-4	Fusarium oxysporum f.sp. cubense	Musa spp.	MH734323.1	-	-	-	-
cub_NS4-1	Fusarium oxysporum f.sp. cubense	Musa spp.	MH734332.1	-	-	-	-
cub_Jhr2-1	Fusarium oxysporum f.sp. cubense	Musa spp.	MH734330.1	-	-	-	-
cub_B-S53	Fusarium oxysporum f.sp. cubense	Musa spp.	-	-	-	-	MW340848.1
cub_B-s58	Fusarium oxysporum f.sp. cubense	Musa spp.	-	-	-	-	MW340847.1
cub_BRIP40340	Fusarium oxysporum f.sp. cubense	Musa spp.	KX434999.1	-	-	-	KX435023.1
cub_BRIP62892	Fusarium oxysporum f.sp. cubense	Musa spp.	-	-	-	-	KX435021.2
cub_BRIP44012	Fusarium oxysporum f.sp. cubense	Musa spp.	KX434997.1	KX435009.1	-	-	-
cub_BRIP62895	Fusarium oxysporum f.sp. cubense	Musa spp.	-	-	-	-	KX435019.1
cub_BRIP62911	Fusarium oxysporum f.sp. cubense	Musa spp.	-	-	-	-	KX435020.1
cub_BRIP62962	Fusarium oxysporum f.sp. cubense	Musa spp.	-	KX435010.1	KX435018.1	-	-
cub_RBG6375	Fusarium oxysporum f.sp. cubense	Musa spp.	-	KM893927.1	-	-	-
cub_RBG5181	Fusarium oxysporum f.sp. cubense	Musa spp.	-	KM893926.1	-	-	-
cub_RBG5143	Fusarium oxysporum f.sp. cubense	Musa spp.	-	KM893925.1	-	-	-
cub_RBG4029	Fusarium oxysporum f.sp. cubense	Musa spp.	-	KM893924.1	-	-	-
cub_RBG3607	Fusarium oxysporum f.sp. cubense	Musa spp.	-	KM893923.1	-	-	-
cub_36118	Fusarium oxysporum f.sp. cubense	Musa spp.	-	-	-	-	KX435022.1
cub_19285	Fusarium oxysporum f.sp. cubense	Musa spp.	-	JF957142.1	-	-	-
canar_4223	Fusarium oxysporum f.sp. canariensis	Phoenix canariensis	KM893917.1	KM893939.1	KM893959.1	-	-
canar_1757	Fusarium oxysporum f.sp. canariensis	Phoenix canariensis	KM893915.1	-	-	-	-
canar_2240	Fusarium oxysporum f.sp. canariensis	Phoenix canariensis	-	KM893930.1	-	-	-
canar_2241	Fusarium oxysporum f.sp. canariensis	Phoenix canariensis	-	KM893931.1	-	-	-
canar_2242	Fusarium oxysporum f.sp. canariensis	Phoenix canariensis	-	KM893932.1	-	-	-
canar_2243	Fusarium oxysporum f.sp. canariensis	Phoenix canariensis	-	KM893933.1	-	-	-
canar_2244	Fusarium oxysporum f.sp. canariensis	Phoenix canariensis	KM893913.1	KM893934.1	-	-	-
canar_1780	Fusarium oxysporum f.sp. canariensis	Phoenix canariensis	KM893912.1	-	-	-	-
canar_4221	Fusarium oxysporum f.sp. canariensis	Phoenix canariensis	KM893908.1	KM893938.1	KM893958.1	-	-
canar_4215	Fusarium oxysporum f.sp. canariensis	Phoenix canariensis	-	KM893936.1	KM893955.1	-	-
canar_4216	Fusarium oxysporum f.sp. canariensis	Phoenix canariensis	KM893914.1	-	-	-	-
canar_2978	Fusarium oxysporum f.sp. canariensis	Phoenix canariensis	KM893916.1	KM893935.1	-	-	-
canar_CA7	Fusarium oxysporum f.sp. canariensis	Phoenix canariensis	MH616619.1	-	-	MH746920.1	-
canar_CA5	Fusarium oxysporum f.sp. canariensis	Phoenix canariensis	MH616617.1	-	-	-	-
canar_CA3	Fusarium oxysporum f.sp. canariensis	Phoenix canariensis	MH616615.1	-	-	-	-
canar_CA4	Fusarium oxysporum f.sp. canariensis	Phoenix canariensis	MH616616.1	-	-	-	-
canar_CA6	Fusarium oxysporum f.sp. canariensis	Phoenix canariensis	MH616618.1	-	-	MH746919.1	-
canar_4220	Fusarium oxysporum f.sp. canariensis	Phoenix canariensis	-	KM893937.1	KM893957.1	-	-
canar_4219	Fusarium oxysporum f.sp. canariensis	Phoenix canariensis	KM893909.1	-	KM893956.1	-	-
canar_PLM908A	Fusarium oxysporum f.sp. canariensis	Phoenix canariensis	-	-	-	MH746915.1	-
canar_PLM706A	Fusarium oxysporum f.sp. canariensis	Phoenix canariensis	-	-	-	MH746913.1	-
canar_PLM588A	Fusarium oxysporum f.sp. canariensis	Phoenix canariensis	-	-	-	MH746909.1	-
lini_FOLIN	Fusarium oxysporum f.sp. lini	Linum usitatissimum	-	-	KP964982.1	KP964992.1	KP964998.1
lini_FRL11810	Fusarium oxysporum f.sp. lini	Linum usitatissimum	KM893920.1	KM893928.1	KM893941.1	-	-
lini_FRL11811	Fusarium oxysporum f.sp. lini	Linum usitatissimum	KM893918.1	KM893929.1	KM893942.1	-	-
Fol_SIX144	Fusarium oxysporum f.sp. lycopersici	Solanum lycopersicon	KM047029.1	-	-	-	-
Fol_BFOL-51	Fusarium oxysporum f.sp. lycopersici	Solanum lycopersicon	GQ268948.1	GQ268954.1	-	-	-
Fol_SIX135	Fusarium oxysporum f.sp. lycopersici	Solanum lycopersicon	KM047028.1	-	-	-	-
Fol3	Fusarium oxysporum f.sp. lycopersici	Solanum lycopersicon	MK906593.1	MK906619.1	MK906667.1	-	MK906694.1
Fol_UDC-10	Fusarium oxysporum f.sp. lycopersici	Solanum lycopersicon	MN745204.1	-	-	-	-
Fol59	Fusarium oxysporum f.sp. lycopersici	Solanum lycopersicon	MN745203.1	-	-	-	-
Fol1	Fusarium oxysporum f.sp. lycopersici	Solanum lycopersicon	MK906591.1	MK906617.1	MK906665.1	-	MK906692.1
Fol2	Fusarium oxysporum f.sp. lycopersici	Solanum lycopersicon	MK906592.1	MK906618.1	MK906666.1	-	MK906693.1
Fol_oxy-1	Fusarium oxysporum f.sp. lycopersici	Solanum lycopersicon	-	KM503197.1	-	-	-
Fol_PLM905	Fusarium oxysporum f.sp. lycopersici	Solanum lycopersicon	-	MH764405.1	MH764408.1	MH764409.1	-
Fol_FRL4273	Fusarium oxysporum f.sp. lycopersici	Solanum lycopersicon	KM893921.1	KM893940.1	KM893943.1	-	-
phys_UB47	Fusarium oxysporum f.sp. physali	Physalis spp.	MW160895.1; MW160896.1	MW160897.1	MW160898.1	MW160899.1	MW160900.1
phys_25-SIX1a	Fusarium oxysporum f.sp. physali	Physalis spp.	MW160863.1; MW160864.1	MW160865.1	MW160866.1	MW160867.1	MW160868.1
phys_P12-SIX1a	Fusarium oxysporum f.sp. physali	Physalis spp.	MW160879.1; MW160880.1	MW160881.1	MW160882.1	MW160883.1	MW160884.1
phys_MAP5	Fusarium oxysporum f.sp. physali	Physalis spp.	-	-	-	-	MT738929.1
cong_FRL1578	Fusarium oxysporum f.sp. conglutinans	Brassica oleracea	KR855720.1	-	-	-	-
medicag_BRIP5189	Fusarium oxysporum f.sp. medicagensis	Medicago sativa	KX435031.1	-	-	-	KX435035.1
medicag_FRL1582	Fusarium oxysporum f.sp. medicagensis	Medicago sativa	KR855719.1	-	-	-	-
pisi_R2-2	Fusarium oxysporum f.sp. pisi	Pisum sativum	MT710719.1	-	-	-	-
pisi_F81-2	Fusarium oxysporum f.sp. pisi	Pisum sativum	MT710717.1	-	-	-	-
pisi_R2-3	Fusarium oxysporum f.sp. pisi	Pisum sativum	MT710720.1	-	-	-	-
pisi_R2-1	Fusarium oxysporum f.sp. pisi	Pisum sativum	MT710718.1	-	-	-	MT710736.1
pisi_F81-1	Fusarium oxysporum f.sp. pisi	Pisum sativum	MT710716.1	-	-	-	MT710735.1
pisi_YPPS 9-1-M-2	Fusarium oxysporum f.sp. pisi	Pisum sativum	-	LC648775.1	LC648777.1	-	-
pisi_FOP1	Fusarium oxysporum f.sp. pisi	Pisum sativum	MT710715.1	MT710729.1; KP964969.1	MT710732.1; KP964983.1	MT710734.1; KP964993.1	-
pisi_FOP2	Fusarium oxysporum f.sp. pisi	Pisum sativum	-	-	-	-	MT710738.1
pisi_FOP5	Fusarium oxysporum f.sp. pisi	Pisum sativum	-	-	-	-	KP964999.1
pisi_YPPS 12-1	Fusarium oxysporum f.sp. pisi	Pisum sativum	-	-	-	-	LC648773.1
pisi_YPPS 10-1	Fusarium oxysporum f.sp. pisi	Pisum sativum	-	-	-	-	LC648772.1
pisi_YPPS KKB31	Fusarium oxysporum f.sp. pisi	Pisum sativum	-	-	-	-	LC648771.1
pisi_YPPS 2-9-M	Fusarium oxysporum f.sp. pisi	Pisum sativum	-	-	-	-	LC648770.1
pisi_200929a	Fusarium oxysporum f.sp. pisi	Pisum sativum	-	-	-	-	LC648774.1
pisi_YPPS 2-4-2-M	Fusarium oxysporum f.sp. pisi	Pisum sativum	-	-	-	-	LC648769.1
pisi_YPPS 1-5-2-M	Fusarium oxysporum f.sp. pisi	Pisum sativum	-	-	-	-	LC648768.1
pisi_YPPS 1-2-1-5	Fusarium oxysporum f.sp. pisi	Pisum sativum	-	-	-	-	LC648767.1
pisi_YPPS 1-1-M	Fusarium oxysporum f.sp. pisi	Pisum sativum	-	-	-	-	LC648766.1
pisi_YPPS 49b	Fusarium oxysporum f.sp. pisi	Pisum sativum	-	-	-	-	LC648765.1
pisi_YPPS 39b	Fusarium oxysporum f.sp. pisi	Pisum sativum	-	-	-	-	LC648764.1
pisi_YPPS 28a	Fusarium oxysporum f.sp. pisi	Pisum sativum	-	-	-	-	LC648763.1
pisi_YPPS 22a	Fusarium oxysporum f.sp. pisi	Pisum sativum	-	-	-	-	LC648762.1
pisi_F40	Fusarium oxysporum f.sp. pisi	Pisum sativum	-	-	-	-	MT710737.1
apii-1	Fusarium oxysporum f.sp. apii	Apium graveolens	MT364398.1	-	-	-	-
apii-2	Fusarium oxysporum f.sp. apii	Apium graveolens	MT364385.1	-	-	-	-
sesami_FS08027	Fusarium oxysporum f.sp. sesami	Sesamum indicum	MN417207.1	MN417210.1	MN417217.1	-	-
frag_BRIP53860	Fusarium oxysporum f.sp. fragariae	Fragaria moschata	KX435028.1	-	-	-	KX435029.1
cep_Fus129	Fusarium oxysporum f.sp. cepae	Allium cepa	-	MK906623.1	MK906671.1	-	-
cep_Fus127	Fusarium oxysporum f.sp. cepae	Allium cepa	-	MK906622.1	-	-	-
cep_Fus125	Fusarium oxysporum f.sp. cepae	Allium cepa	-	MK906621.1	-	-	-
cep_Fus062	Fusarium oxysporum f.sp. cepae	Allium cepa	-	MK906620.1	-	-	-
cep_Fox129	Fusarium oxysporum f.sp. cepae	Allium cepa	-	-	MW939421.1	-	-
cep_Fox220a	Fusarium oxysporum f.sp. cepae	Allium cepa	-	MW939413.1	MW939415.1	MW939416.1	-
cep_Fox260	Fusarium oxysporum f.sp. cepae	Allium cepa	-	MW939405.1	MW939407.1	MW939408.1	-
cep_FUS2	Fusarium oxysporum f.sp. cepae	Allium cepa	-	KP964968.1	KP964987.1	KP964996.1	-
cep_Fus395	Fusarium oxysporum f.sp. cepae	Allium cepa	-	-	-	-	MK906695.1
cep_Fus402	Fusarium oxysporum f.sp. cepae	Allium cepa	-	-	MK906673.1	-	-
cep_Fus400	Fusarium oxysporum f.sp. cepae	Allium cepa	-	-	MK906672.1	-	-
narc_FOXN63	Fusarium oxysporum f.sp. narcissi	Narcissus sp.	-	MN078961.1	MN078963.1	MN078964.1	MN078965.1
narc_FOXN139	Fusarium oxysporum f.sp. narcissi	Narcissus sp.	-	KP964972.1	KP964985.1	KP964995.1	-
narc_FOXN7	Fusarium oxysporum f.sp. narcissi	Narcissus sp.	-	KP964971.1	-	KP964990.1	-
zing_BRIP39299	Fusarium oxysporum f.sp. zingiberi	Zingiber officinale	-	KX435050.1	KX435051.1	KX435052.1	-
diant_R207	Fusarium oxysporum f.sp. dianthi	Dianthus sp.	-	KP964970.1	KP964981.1	KP964991.1	-
alb_FMB-FO-PD-011	Fusarium oxysporum f.sp. albedins	Phoenix dactylifera	-	-	MZ803209.1	-	-
palm_PLM791A	Fusarium oxysporum f.sp. palmarum	Syagrus romanzoffiana, Washingtonia robusta	-	-	MH743215.1	-	-
palm_PLM741A	Fusarium oxysporum f.sp. palmarum	Syagrus romanzoffiana, Washingtonia robusta	-	-	MH743214.1	-	-
palm_PLM632A	Fusarium oxysporum f.sp. palmarum	Syagrus romanzoffiana, Washingtonia robusta	-	-	MH743213.1	-	-
palm_PLM560A	Fusarium oxysporum f.sp. palmarum	Syagrus romanzoffiana, Washingtonia robusta	-	-	MH743211.1	-	-
palm_PLM510A	Fusarium oxysporum f.sp. palmarum	Syagrus romanzoffiana, Washingtonia robusta	-	-	MH743210.1	-	-
niv_NTDPI36955	Fusarium oxysporum f.sp. niveum	Citrullus lanatus	-	-	-	-	KX435044.1
niv_NTDPI36956	Fusarium oxysporum f.sp. niveum	Citrullus lanatus	-	-	-	-	KX435043.1

## Sheet: Table S3
Table S3. List of PCR primers for analysis of the presence of SIX genes in Folini genomes.
Gene	Direction	Primer sequence (5′–3′)	Annealing temp. (°C)	Reference
SIX1	F	ATGGTACTCCTTGGCGCCCTC	60	Meldrum et al. (2012)
	R	TGACAATGCGACCACGCCTCG
SIX2	F	CAACGCCGTTTGAATAAGCA	55.5	Lievens et al. (2009)
	R	TCTATCCGCTTTCTTCTCTC
SIX3	F	CCAGCCAGAAGGCCAGTTT	55.5	Lievens et al. (2009)
	R	GGCAATTAACCACTCTGCC
SIX4	F	TCAGGCTTCACTTAGCATAC	55.5	Lievens et al. (2009)
	R	GCCGACCGAAAAACCCTAA
SIX5	F	ACACGCTCTACTACTCTTCA	55.5	Lievens et al. (2009)
	R	GAAAACCTCAACGCGGCAAA
SIX6	F	CTCTCCTGAACCATCAACTT	59	Lievens et al. (2009)
	R	CAAGACCAGGTGTAGGCATT
SIX7	F	CATCTTTTCGCCGACTTGGT	56	Lievens et al. (2009)
	R	CTTAGCACCCTTGAGTAACT
SIX8	F	TCGCCTGCATAACAGGTGCCG	58	Meldrum et al. (2012)
	R	TTGTGTAGAAACTGGACAGTCGATGC
SIX9	F	CTTCTAGCAGTTGTAGCCAC	56	Laurence et al. (2015)
	R	GTACGCCATTGACGCAAG
SIX10	F	CGAGACGGAGCATTCATA	54	This study
	R	CTGAACCTGAACGAACAAG	56
SIX11	F	GATGTTCTCCAAAGCCATCC	56	Laurence et al. (2015)
	R	AGAATGCCACTCGGTGTGA
SIX12	F	GTATCAGCAACCAGAATG	52	This study
	R	GAGACTTCATCACCAGAG	54
SIX13	F	CCTTCATCATCGACAGTACAACG	58	Taylor et al. (2016)
	R	ATCAAACCCGTAACTCAGCTCC
SIX14	F	TTGCCACCTATGCATACCG	56	Laurence et al. (2015)
	R	TCCACATTCCTAAGCGAACC

## Sheet: Table S4
	Table 4. List of PFAM domains exclusively found in isolates exhibiting strong and weak virulence.
PFAM	pangenome category	virulence group	ID	name	Protein functional group
PF01120	acc	S	Alpha_L_fucos	Alpha-L-fucosidase	CAZY
PF03648	acc	S	Glyco_hydro_67N	Glycosyl hydrolase family 67 N-terminus	CAZY
PF04117	acc	S	Mpv17_PMP22	Mpv17 / PMP22 family	CAZY
PF05368	acc	S	NmrA	NmrA-like family	CAZY
PF07477	acc	S	Glyco_hydro_67C	Glycosyl hydrolase family 67 C-terminus	CAZY
PF07488	acc	S	Glyco_hydro_67M	Glycosyl hydrolase family 67 middle domain	CAZY
PF13460	acc	S	NAD_binding_10	NAD(P)H-binding	CAZY
PF16126	acc	S	DUF4838	Domain of unknown function (DUF4838)	CAZY
PF16460	acc	S	Phage_TTP_11	Phage tail tube, TTP, lambda-like	CAZY
PF01161	acc	S	PBP	Phosphatidylethanolamine-binding protein	Effector
PF01420	acc	S	Methylase_S	Type I restriction modification DNA specificity domain	Effector
PF01670	acc	S	Glyco_hydro_12	Glycosyl hydrolase family 12	Effector
PF04122	acc	S	CW_binding_2	ell wall binding domain 2 (CWB2)	Effector
PF06247	acc	S	Plasmod_Pvs28	Pvs28 EGF domain	Effector
PF07645	acc	S	EGF_CA	Calcium-binding EGF domain	Effector
PF13923	acc	S	zf-C3HC4_2	Zinc finger, C3HC4 type (RING finger)	Effector
PF16460	acc	S	Phage_TTP_11	Phage tail tube, TTP, lambda-like	Effector
PF17120	acc	S	Zn_ribbon_17	Zinc-ribbon, C4HC2 type	Effector
PF20130	acc	S	DUF6520	Family of unknown function (DUF6520)	Effector
PF01161	acc	S	PBP	Phosphatidylethanolamine-binding protein	Protease
PF04122	acc	S	CW_binding_2	ell wall binding domain 2 (CWB2)	Protease
PF04952	acc	S	AstE_AspA	Succinylglutamate desuccinylase / Aspartoacylase family	Protease
PF09362	core	S	DUF1996	Domain of unknown function (DUF1996)	Effector
PF13650	core	S	Asp_protease_2	Aspartyl protease	Effector
PF01134	singl	S	GIDA	Glucose inhibited division protein A	CAZY
PF02737	singl	S	3HCDH_N	3-hydroxyacyl-CoA dehydrogenase, NAD binding domain	CAZY
PF03632	singl	S	Glyco_hydro_65m	Glycosyl hydrolase family 65 central catalytic domain	CAZY
PF03633	singl	S	Glyco_hydro_65C	Glycosyl hydrolase family 65, C-terminal domain	CAZY
PF03636	singl	S	Glyco_hydro_65N	Glycosyl hydrolase family 65, N-terminal domain	CAZY
PF03779	singl	S	SPW	SPW repeat	CAZY
PF05691	singl	S	Raffinose_syn	Raffinose synthase or seed imbibition protein Sip1	CAZY
PF09500	singl	S	YiiD_C	Putative thioesterase (yiiD_Cterm)	CAZY
PF17851	singl	S	GH43_C2	Beta xylosidase C-terminal Concanavalin A-like domain	CAZY
PF00704	singl	S	Glyco_hydro_18	Glycosyl hydrolases family 18	Effector
PF01442	singl	S	Apolipoprotein	Apolipoprotein A1/A4/E domain	Effector
PF01764	singl	S	Lipase_3	Lipase (class 3)	Effector
PF02469	singl	S	Fasciclin	Fasciclin domain	Effector
PF03372	singl	S	Exo_endo_phos	Endonuclease/Exonuclease/phosphatase family	Effector
PF05086	singl	S	Dicty_REP	Dictyostelium (Slime Mold) REP protein	Effector
PF05415	singl	S	Peptidase_C36	Beet necrotic yellow vein furovirus-type papain-like endopeptidase	Effector
PF07819	singl	S	PGAP1	PGAP1-like protein	Effector
PF11187	singl	S	DUF2974	Protein of unknown function (DUF2974)	Effector
PF12732	singl	S	YtxH	YtxH-like protein	Effector
PF13572	singl	S	DUF4134	Domain of unknown function (DUF4134)	Effector
PF14529	singl	S	Exo_endo_phos_2	Endonuclease-reverse transcriptase	Effector
PF16011	singl	S	CBM9_2	Carbohydrate-binding family 9	Effector
PF19840	singl	S	DUF6317	Family of unknown function (DUF6317)	Effector
PF07687	singl	S	M20_dimer	Peptidase dimerisation domain	Protease
PF20021	singl	S	VMAP-M18	vWA-MoxR associated protein middle region (VMAP-M) 18	Protease
PF02113	acc	W	Peptidase_S13	D-Ala-D-Ala carboxypeptidase 3 (S13) family	CAZY
PF09716	acc	W	ETRAMP	Malarial early transcribed membrane protein (ETRAMP)	CAZY
PF13434	acc	W	K_oxygenase	L-lysine 6-monooxygenase (NADPH-requiring)	CAZY
PF13454	acc	W	NAD_binding_9	FAD-NAD(P)-binding	CAZY
PF16010	acc	W	CDH-cyt	Cytochrome domain of cellobiose dehydrogenase	CAZY
PF20067	acc	W	APMAP_N	Adipocyte plasma membrane-associated protein-like, N-terminal	CAZY
PF00630	acc	W	Filamin	Filamin/ABP280 repeat	Effector
PF01817	acc	W	CM_2	Chorismate mutase type II	Effector
PF02495	acc	W	TGBp3	Triple gene block 3	Effector
PF04471	acc	W	Mrr_cat	Restriction endonuclease	Effector
PF05084	acc	W	GRA6	Granule antigen protein (GRA6)	Effector
PF07691	acc	W	PA14	PA14 domain	Effector
PF11721	acc	W	Malectin	Malectin domain	Effector
PF13409	acc	W	GST_N_2	Glutathione S-transferase, N-terminal domain	Effector
PF14055	acc	W	NVEALA	NVEALA protein	Effector
PF15891	acc	W	Nuc_deoxyri_tr2	Nucleoside 2-deoxyribosyltransferase like	Effector
PF15918	acc	W	DUF4744	Domain of unknown function (DUF4744)	Effector
PF20150	acc	W	2EXR	2EXR family	Effector
PF01793	acc	W	Glyco_transf_15	Glycolipid 2-alpha-mannosyltransferase	Protease
PF03963	acc	W	FlgD	Flagellar hook capping protein - N-terminal region	Protease
PF04471	acc	W	Mrr_cat	Restriction endonuclease	Protease
PF05276	acc	W	SH3BP5	SH3 domain-binding protein 5 (SH3BP5)	Protease
PF05854	acc	W	MC1	Non-histone chromosomal protein MC1	Protease
PF07934	acc	W	OGG_N	8-oxoguanine DNA glycosylase, N-terminal domain	Protease
PF11199	acc	W	DUF2891	Protein of unknown function (DUF2891)	Protease
PF13250	acc	W	DUF4041	Domain of unknown function (DUF4041)	Protease
PF14071	acc	W	YlbD_coat	Putative coat protein	Protease
PF17766	acc	W	fn3_6	Fibronectin type-III domain	Protease
PF18277	acc	W	AbrB_C	AbrB C-terminal domain	Protease
PF01301	core	W	Glyco_hydro_35	Glycosyl hydrolases family 35	CAZY
PF10435	core	W	BetaGal_dom2	Beta-galactosidase, domain 2	CAZY
PF13363	core	W	BetaGal_dom3	Beta-galactosidase, domain 3	CAZY
PF13364	core	W	BetaGal_dom4_5	Beta-galactosidase jelly roll domain	CAZY
PF00811	core	W	Ependymin	Ependymin	Effector
PF03639	core	W	Glyco_hydro_81	Glycosyl hydrolase family 81 N-terminal domain	Effector
PF05345	core	W	He_PIG	Putative Ig domain	Effector
PF01270	core	W	Glyco_hydro_8	Glycosyl hydrolases family 8	Protease
PF13354	core	W	Beta-lactamase2	Beta-lactamase enzyme family	Protease
PF00331	singl	W	Glyco_hydro_10	Glycosyl hydrolase family 10	CAZY
PF00905	singl	W	Transpeptidase	Penicillin binding protein transpeptidase domain	CAZY
PF01728	singl	W	FtsJ	FtsJ-like methyltransferase	CAZY
PF01839	singl	W	FG-GAP	FG-GAP repeat	CAZY
PF02390	singl	W	Methyltransf_4	Putative methyltransferase	CAZY
PF02449	singl	W	Glyco_hydro_42	Beta-galactosidase	CAZY
PF02836	singl	W	Glyco_hydro_2_C	Glycosyl hydrolases family 2, TIM barrel domain	CAZY
PF03198	singl	W	Glyco_hydro_72	Glucanosyltransferase	CAZY
PF03244	singl	W	PSI_PsaH	Photosystem I reaction centre subunit VI	CAZY
PF03659	singl	W	Glyco_hydro_71	Glycosyl hydrolase family 71	CAZY
PF03664	singl	W	Glyco_hydro_62	Glycosyl hydrolase family 62	CAZY
PF05175	singl	W	MTS	Methyltransferase small domain	CAZY
PF07081	singl	W	DUF1349	Protein of unknown function (DUF1349)	CAZY
PF07983	singl	W	X8	X8 domain	CAZY
PF08241	singl	W	Methyltransf_11	Methyltransferase domain	CAZY
PF08242	singl	W	Methyltransf_12	Methyltransferase domain	CAZY
PF10294	singl	W	Methyltransf_16	Lysine methyltransferase	CAZY
PF10892	singl	W	DUF2688	Protein of unknown function (DUF2688)	CAZY
PF12256	singl	W	TcdB_toxin_midN	Insecticide toxin TcdB middle/N-terminal region	CAZY
PF12705	singl	W	PDDEXK_1	PD-(D/E)XK nuclease superfamily	CAZY
PF13489	singl	W	Methyltransf_23	Methyltransferase domain	CAZY
PF13517	singl	W	FG-GAP_3	FG-GAP-like repeat	CAZY
PF13649	singl	W	Methyltransf_25	Methyltransferase domain	CAZY
PF13847	singl	W	Methyltransf_31	Methyltransferase domain	CAZY
PF15139	singl	W	DUF4572	Domain of unknown function (DUF4572)	CAZY
PF16229	singl	W	DUF4888	Domain of unknown function (DUF4888)	CAZY
PF17573	singl	W	GA-like	GA-like domain	CAZY
PF17891	singl	W	FluMu_N	Mu-like prophage FluMu N-terminal domain	CAZY
PF18271	singl	W	GH131_N	Glycoside hydrolase 131 catalytic N-terminal domain	CAZY
PF19690	singl	W	DUF6191	Family of unknown function (DUF6191)	CAZY
PF00089	singl	W	Trypsin	Trypsin	Effector
PF00150	singl	W	Cellulase	Cellulase (glycosyl hydrolase family 5)	Effector
PF00264	singl	W	Tyrosinase	Common central domain of tyrosinase	Effector
PF00450	singl	W	Peptidase_S10	Serine carboxypeptidase	Effector
PF01528	singl	W	Herpes_glycop	Herpesvirus glycoprotein M	Effector
PF02230	singl	W	Abhydrolase_2	Phospholipase/Carboxylesterase	Effector
PF02838	singl	W	Glyco_hydro_20b	Glycosyl hydrolase family 20, domain 2	Effector
PF03244	singl	W	PSI_PsaH	Photosystem I reaction centre subunit VI	Effector
PF05736	singl	W	OprF	OprF membrane domain	Effector
PF05922	singl	W	Inhibitor_I9	Peptidase inhibitor I9	Effector
PF09011	singl	W	HMG_box_2	HMG-box domain	Effector
PF10171	singl	W	Tim29	Translocase of the Inner Mitochondrial membrane 29	Effector
PF13365	singl	W	Trypsin_2	Trypsin-like peptidase domain	Effector
PF13458	singl	W	Peripla_BP_6	Periplasmic binding protein	Effector
PF14845	singl	W	Glycohydro_20b2	beta-acetyl hexosaminidase like	Effector
PF16229	singl	W	DUF4888	Domain of unknown function (DUF4888)	Effector
PF17380	singl	W	DUF5401	Family of unknown function (DUF5401)	Effector
PF17609	singl	W	HCMV_UL124	Family of unknown function	Effector
PF18027	singl	W	Pepdidase_M14_N	Cytosolic carboxypeptidase N-terminal domain	Effector
PF19690	singl	W	DUF6191	Family of unknown function (DUF6191)	Effector
PF00089	singl	W	Trypsin	Trypsin	Protease
PF00205	singl	W	TPP_enzyme_M	Thiamine pyrophosphate enzyme, central domain	Protease
PF01483	singl	W	P_proprotein	Proprotein convertase P-domain	Protease
PF01528	singl	W	Herpes_glycop	Herpesvirus glycoprotein M	Protease
PF03096	singl	W	Ndr	Ndr family	Protease
PF03583	singl	W	LIP	Secretory lipase	Protease
PF05736	singl	W	OprF	OprF membrane domain	Protease
PF06441	singl	W	EHN	Epoxide hydrolase N terminus	Protease
PF07819	singl	W	PGAP1	PGAP1-like protein	Protease
PF10757	singl	W	YbaJ	Biofilm formation regulator YbaJ	Protease
PF11144	singl	W	DUF2920	Protein of unknown function (DUF2920)	Protease
PF12616	singl	W	DUF3775	Protein of unknown function (DUF3775)	Protease
PF13365	singl	W	Trypsin_2	Trypsin-like peptidase domain	Protease
PF15781	singl	W	ParE-like_toxin	ParE-like toxin of type II bacterial toxin-antitoxin system	Protease
PF16470	singl	W	S8_pro-domain	Peptidase S8 pro-domain	Protease

## Sheet: Table S5
Table S4. PFAM specific domain statistics with breakdown into virulance and finctional class categories
Total domains	CAZYmes			Effectors			Proteases
	accessory	singleton	core	accessory	singleton	core	accessory	singleton	core
W (103)*	6	30	4	12	20	3	11	15	2
S (49)	9	9	0	10	14	2	3	2	0
* S- strongly virulent group, W - weakly virulent group of strains, number in brackets - total domaim number in a group

## Sheet: Table S6
Table S4. Number of the core, accessory and singleton effector genes mapped to conservative and variable MI39 and F418 genome compartments.
Genome	Pangenome category	G e n o m e C o m p a r t m e n t
		conservative								dispensable
		TOTAL genes	CAZYmes			effectors		proteases		TOTAL genes	CAZYmes	effectors	proteases
MI39	core	11656	63			63		35		23	0	0	0
	accsessory	1977	23	0,267*		39	0,394*	10	0,222*	321	7	11	2
	singletons	99	0			2		0		166	0	1	0
F418	core	11664	62			63		35		24	0	0	0
	accsessory	1982	25		0,303*	37	0,37*	10	0,271*	233	6	9	1
	singletons	199	2			0		3		105	0	0	0
* - fraction of non-core genes in a pansecretome class
